# Supplementary material for: Simple in situ preconcentration for electrolyte atmospheric liquid discharge optical emission spectrometric determination of trace cadmium on microplastics
Source: Royal Society of Chemistry journal article supplement (doi:10.1039/d2ja00308b), 2022-12-20
Supplement: d2ja00308b1.pdf [file d2ja00308b1.pdf]

## Electronic Supplementary Information

### Simple In-situ Preconcentration for Electrolyte Atmospheric Liquid Discharge Optical Emission Spectrometric Determination of Trace Cadmium on Microplastic

Jiadeng Chen,<sup>a</sup> Xiaoming Jiang,<sup>a</sup> Yunfei Tian<sup>\*a</sup> and Xiandeng Hou<sup>\*a, b</sup>

<sup>a</sup>Analytical Testing Center, Sichuan University, Chengdu, Sichuan 610064, China. E-mail: tianyunfei@scu.edu.cn

<sup>b</sup>College of Chemistry, Sichuan University, Chengdu, Sichuan 610064, China. E-mails: tianyunfei@scu.edu.cn;

houxd@scu.edu.cn

#### Contents

|                                                                                                           |    |
|-----------------------------------------------------------------------------------------------------------|----|
| Fig. S1 Waveforms of gap voltage and discharge current.....                                               | S2 |
| Fig. S2 Analytical performance of ISP-EALD-OES.....                                                       | S2 |
| Fig. S3 Signal spectra for a 10 µg mL <sup>-1</sup> standard containing Co, Cu, Hg, Ni, Pb and Zn.....    | S3 |
| Table S1 Optimized experimental conditions for other heavy metal elements.....                            | S3 |
| Table S2 Comparison of LOD by ISP-EALD-OES with those afforded by other microplasma-based OES.....        | S3 |
| Fig. S4 (a) Cadmium standard curve by ICP-MS and (b) cadmium content of blank microplastic materials..... | S4 |
| Fig. S5 Simulated adsorption and desorption of Cd on microplastics.....                                   | S4 |
| Fig. S6 Photos of real samples of microplastics.....                                                      | S4 |
| Fig. S7 Raman spectra of real microplastic samples.....                                                   | S5 |
| Fig. S8 SEM images of real microplastic samples.....                                                      | S5 |
| Fig. S9 High resolution SEM images of real microplastic samples.....                                      | S5 |
| References.....                                                                                           | S6 |

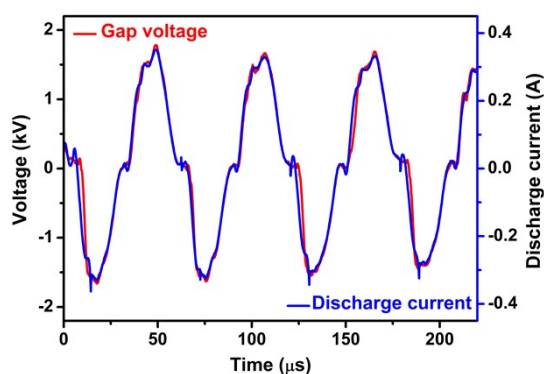

**Fig. S1 Waveforms of gap voltage and discharge current**

Note: The information of gap voltage and discharge current is of great significance to reveal the ignition and extinction mechanism of a microplasma. Figure S1 shows the waveform of gap voltage and discharge current under the condition of 2.0 mm discharge gap. As shown in the figure, it can be noted that the gap voltage is about 1.5-1.8 kV, and the discharge current changes slowly and lasts for a long time ( $\sim 50 \mu\text{s}$ ). The waveforms of gap voltage and discharge current are almost the same, and the discharge is very similar to a typical glow discharge mode.

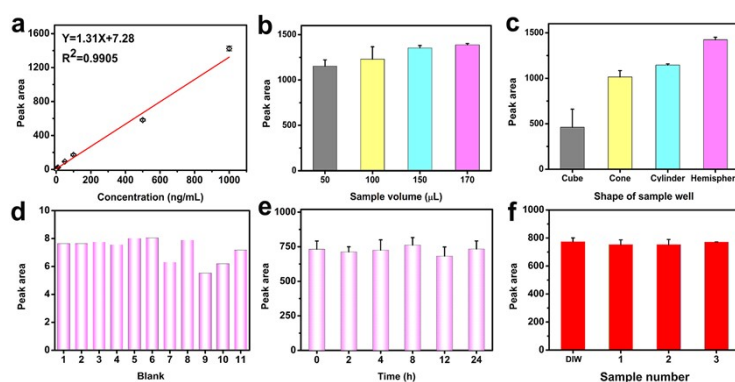

**Fig. S2 Analytical performance of ISP-EALD-OES**

Note: Cd standard curve (a) of  $2.5\text{-}1000 \text{ ng mL}^{-1}$ ; (b) Optimization of sample volume; (c) Optimization of sample well shape; (d) 11 trials of blank peak areas; (e) long-term stability in 24 h (Cd standard solution,  $500 \text{ ng/mL}$ ); and (f) Anti-interference test with deionized water (DIW) and several carwash wastewaters (1-3). The concentrations of Cd added are all  $500 \text{ ng/mL}$ .

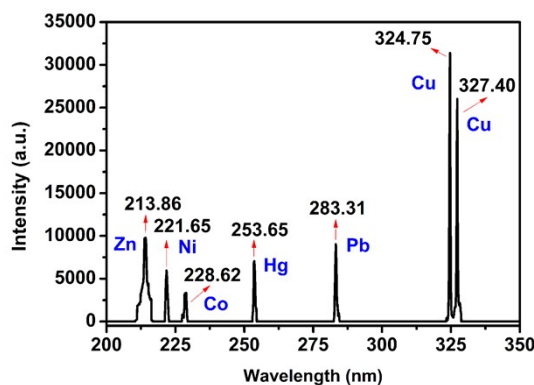

**Fig. S3 Signal spectra for a 10  $\mu\text{g mL}^{-1}$  standard containing Co, Cu, Hg, Ni, Pb and Zn.**

**Table S1 Optimized experimental conditions for other heavy metal elements**

| Element | Electrode distance<br>(mm) | Discharge<br>voltage<br>(V) | Collection distance<br>(cm) | Peak time<br>(s) |
|---------|----------------------------|-----------------------------|-----------------------------|------------------|
| Zn      | 1                          | 250                         | 2                           | 60               |
| Ni      | 1                          | 250                         | 2                           | 50               |
| Co      | 1                          | 250                         | 2                           | 65               |
| Hg      | 1                          | 250                         | 1.5                         | 5                |
| Pb      | 2                          | 250                         | 2                           | 55               |
| Cu      | 2                          | 250                         | 2                           | 62               |

**Table S2 Comparison of LOD by ISP-EALD-OES with those afforded by other microplasma-based OES**

| Element | LOD ( $\text{ng mL}^{-1}$ ) |                    |                      |                   |
|---------|-----------------------------|--------------------|----------------------|-------------------|
|         | This Work                   | ELCAD <sup>1</sup> | LS-APGD <sup>2</sup> | SCGD <sup>3</sup> |
| Zn      | 5                           | 3                  | 900                  | -                 |
| Ni      | 8                           | -                  | 60                   | 6                 |
| Co      | 15                          | -                  | 200                  | -                 |
| Hg      | 7                           | 15                 | -                    | 2                 |
| Pb      | 5                           | 45                 | -                    | 1                 |
| Cu      | 2                           | 11                 | 80                   | 6                 |

ELCAD: electrolyte cathode discharge; LS-APGD: liquid sampling atmospheric pressure glow discharge; and SCGD : solution cathode glow discharge.

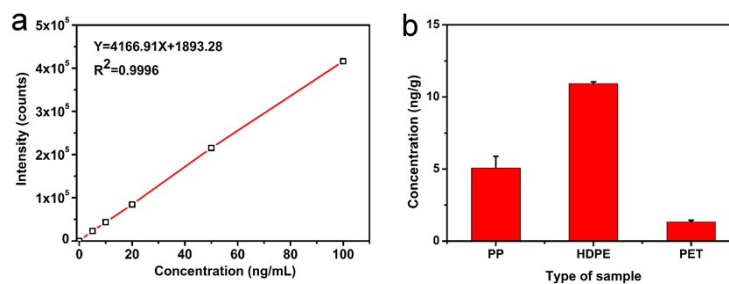

**Fig. S4 (a) Cadmium standard curve by ICP-MS and (b) cadmium content of blank microplastic materials**

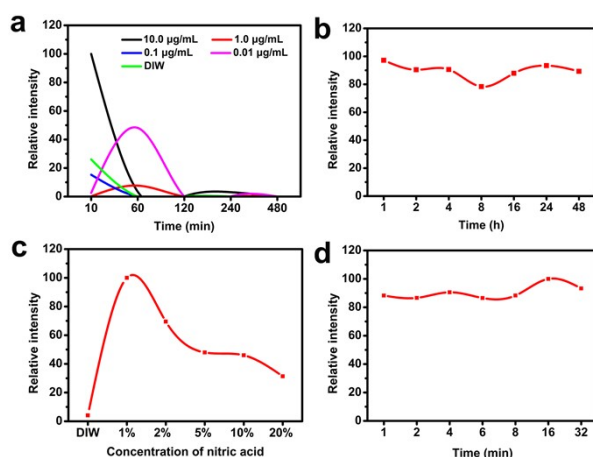

**Fig. S5 Simulated adsorption and desorption of Cd on microplastics**

Note: (a) The adsorption Cd on PE by treatment with different concentrations of Cd for different times; (b) two-day stability of Cd adsorbed on microplastic samples which were first pretreated in 10 µg mL<sup>-1</sup> for adsorption of cadmium for 10 min and dried for later test; (c) concentrations of nitric acid on desorption of Cd from microplastic samples; and (d) centrifugation time on desorption of Cd from microplastics with 1% nitric acid.

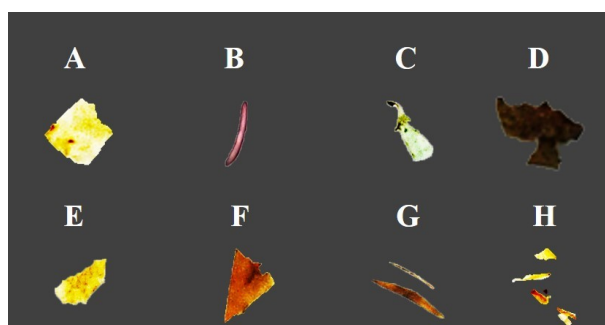

**Fig. S6 Photos of real samples of microplastics**

Notes: (A) plastic bag fragments; (B) red plastic strip; (C) woven bag fragments; (D) black plastic film fragments; (E) yellow microplastics; (F) unknown samples; (G) shell fragments; and (H) twig fragments.

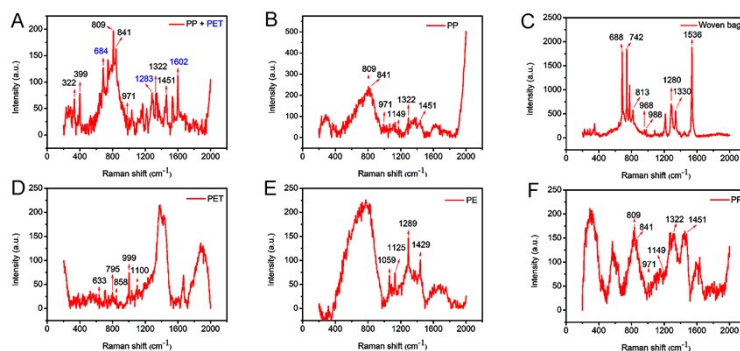

**Fig. S7 Raman spectra of real microplastic samples**

Note: the components of the microplastic samples are therefore mainly PE, PP, and PET. There are also some hybrid

microplastics.

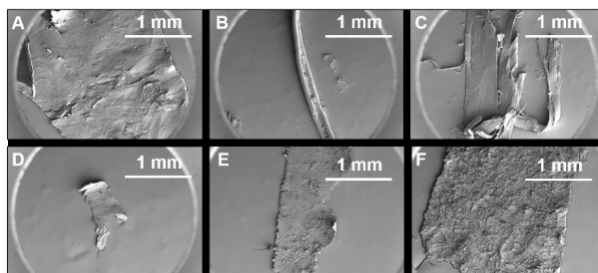

**Fig. S8 SEM images of real microplastic samples**

Note: The microplastics were basically in the range of 1-5 mm in length, with the largest diameter of ca. 2 mm, and the smallest diameter ca. 0.2 mm. Mainly showing flakes (A, D, E, F), strips (B), bands (C). The surface of the microplastics is relatively smooth, and there are no particularly obvious protrusions. Their edge cracks are relatively straight, and there is no obvious tooth shape, which may indicate that the microplastics should be subjected to greater force or easily decomposed during the decomposition process.

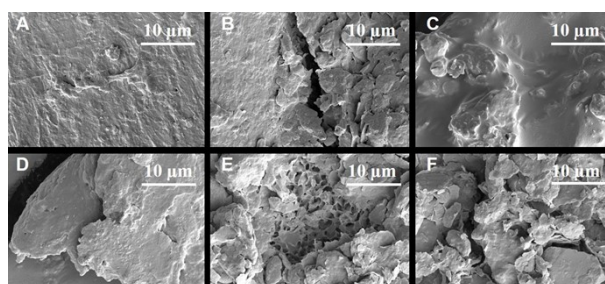

**Fig. S9 High resolution SEM images of real microplastic samples**

Note: the surfaces of the microplastic samples of A, C, and D were relatively smooth, and the surfaces of B, E, and F have many small holes, gaps, small protrusions.

## References

- 1 R. Shekhar, D. Karunasagar, Manjusha Ranjit and J. Arunachalam, *Anal. Chem.*, 2009, **81**, 8157-8166.
- 2 K. A. Hall, H. W. Paing and R. K. Marcus, *Anal. Methods.*, 2021, **13**, 1945-1954.
- 3 T. A. Doroski and M. R. Webb, *Spectrochim. Acta. B.*, 2013, **88**, 40-45.
